1 **Diverse responses among wild banana species to vapour pressure deficit, a**  
2 **solution for drought tolerance breeding?**

3 **Running title:** Physiological diversity in response to VPD

4  
5 **David Eyland<sup>1\*</sup>, Clara Gambart<sup>1\*</sup>, Rony Swennen<sup>1,2</sup>, Sebastien Carpentier<sup>1,3#</sup>**

6 <sup>1</sup>Laboratory of Tropical Crop Improvement, Division of Crop Biotechnics, KU Leuven, Heverlee, Belgium

7 <sup>2</sup>International Institute of Tropical Agriculture, Banana Breeding, Kampala, Uganda

8 <sup>3</sup>Bioversity International, Banana Genetic Resources, Leuven, Belgium

9 \* first co-authorship

10

11 **# corresponding author**

12 Sebastien Carpentier

13 s.carpentier@cgiar.org

14

15 **Email addresses**

16 clara.gambart@kuleuven.be

17 david.eyland1994@gmail.com

18 rony.swennen@kuleuven.be

19 s.carpentier@cgiar.org

20

21 **Date of submission:** August 5, 2022

22 **Number of tables:** 2

23 **Number of figures:** 11

24 **Word count:** 3461

25 **Number of supplemental tables:** 6

26 **Number of supplemental figures:** 1

27

28 **Highlight**

29 Wild banana species respond significantly different to water deficit caused by VPD increases and differ  
30 in the rate of stomatal reduction, revealing opportunities for drought tolerance breeding.

## 31 1 Abstract

32 The predicted rise in global temperature is not only affecting plant functioning directly, but is also  
33 increasing air vapour pressure deficit (VPD). The yield of banana is heavily affected by water deficit  
34 but so far breeding programs have never addressed the issue. A reduction in transpiration at high VPD  
35 has been suggested as a key drought tolerance breeding trait to avoid excessive water loss, hydraulic  
36 failure and to increase water use efficiency. In this study, stomatal and transpiration responses under  
37 increasing VPD at the leaf and whole-plant level of 8 wild banana (sub)species were evaluated,  
38 displaying significant differences in stomatal reactivity. Three different groups were identified under  
39 increasing VPD. *M. acuminata* spp. *errans* (group I), *M. acuminata* spp. *zebrina* (group II) and *M.*  
40 *balbisiana* (group II) showed the highest transpiration rate limitations to increasing VPD. In contrast  
41 to group I, group II only showed strong reductions at high VPD levels, limiting the cost of reduced  
42 photosynthesis and strongly increasing their water use efficiency. Group II genotypes thus show  
43 favourable responses for high water use efficiency in regions with high VPDs. This provides a basis for  
44 the identification of potential parent material within their wild populations for drought tolerance  
45 breeding.

46

47 **Keywords:** diversity, drought tolerance, stomatal conductance, transpiration, vapour pressure deficit,  
48 water deficit, water use efficiency, wild banana species

49

50 **Abbreviations:** A photosynthetic rate;  $A_{\max}$  maximally measured photosynthetic rate;  $A_{\text{meas}}$  measured  
51 photosynthetic rate; ABA abscisic acid;  $E_{\text{rate}}$  transpiration rate;  $E_{\text{meas}}$  measured transpiration rate;  $E_{\text{pred}}$   
52 predicted transpiration rate; Eq equation;  $g_s$  stomatal conductance; h hour; ITC International Transit  
53 Centre; kPa kilopascal; L liter; LA leaf area; m meter; min minutes; mol moles;  $m_{\text{tot}}$  total weight; PC  
54 principal component; s seconds; se standard error; ssp. subspecies;  $R^2$  R-squared;  $t_1$  timepoint 1;  $t_2$   
55 timepoint 2; VPD vapour pressure deficit;  $\text{VPD}_{\text{leaf}}$  leaf-to-air vapour pressure deficit;  $i\text{WUE}$  intrinsic  
56 water use efficiency;  $\mu\text{mol}$  micromoles;  $\phi_E$  transpiration reduction;  $\phi_{\text{stom}}$  stomatal reduction

## 57 2 Introduction

58 Climate change projections predict that global temperatures will continue to increase this century  
59 (IPCC, 2021). This temperature rise is not only affecting plant functioning directly, but is also increasing  
60 air vapour pressure deficit (VPD) (Hatfield and Prueger, 2015; Ficklin and Novick, 2017; Grossiord *et*  
61 *al.*, 2020). VPD represents the atmospheric water vapour demand and is defined as the difference  
62 between the saturation and actual vapour pressure in the atmosphere (Monteith and Unsworth,  
63 2013). The saturation vapour pressure, the water vapour that air can hold, increases exponentially  
64 with temperature and has been increasing as global temperatures rise (Lawrence, 2005). The actual  
65 vapour pressure (i.e. absolute humidity in the air) on the other hand has not been rising at the same  
66 rate as the saturation vapour pressure, therefore increasing the worldwide VPD (Ficklin and Novick,  
67 2017; Grossiord *et al.*, 2020). The impact of this rising VPD is often underestimated compared to other  
68 climate change consequences, but periods of high VPD have recently been linked with large-scale tree  
69 mortality (Breshears *et al.*, 2013; Williams *et al.*, 2013) and strong yield reductions (Challinor and  
70 Wheeler, 2008; Lobell *et al.*, 2013).

71 Plants respond to the vapour pressure deficit encountered at the leaf level, the leaf-to-air vapour  
72 pressure deficit ( $VPD_{leaf}$ ). The leaf temperature can after all deviate from that of the ambient air by  
73 transpirational cooling or heating through radiant energy. For a given stomatal opening, transpiration  
74 would increase linearly with  $VPD_{leaf}$ , without any gain in carbon uptake. Stomatal conductance ( $g_s$ )  
75 however decreases with increasing  $VPD_{leaf}$ , avoiding excessive water loss, but restricting carbon  
76 uptake (Dai, Edwards and Ku, 1992; Monteith, 1995; Oren *et al.*, 1999). In angiosperms the reduction  
77 of  $g_s$  in response to an increase in  $VPD_{leaf}$  is believed to be abscisic acid (ABA) mediated (Xie *et al.*,  
78 2006; Bauer *et al.*, 2013; McAdam and Brodribb, 2015). Upon an increase in  $VPD_{leaf}$ ,  $g_s$  is reduced by a  
79 rapid ABA biosynthesis (i.e. within 20 min) presumably located in the leaf phloem parenchyma cells  
80 and stomatal guard cells (Kuromori, Sugimoto and Shinozaki, 2014; McAdam, Sussmilch and Brodribb,  
81 2016). The trigger for ABA interference under high  $VPD_{leaf}$  is believed to be a drop in water status  
82 (McAdam and Brodribb, 2016; Sack, John and Buckley, 2018), which has been linked to a limited  
83 maximal hydraulic conductance at the leaf, stem and/or root level in comparison to the transpiration  
84 (Brodribb and Jordan, 2008; Zhang *et al.*, 2013; Choudhary *et al.*, 2014; Ocheltree, Nippert and Prasad,  
85 2014; Schoppach *et al.*, 2016). Essential gatekeepers for this hydraulic conductance are aquaporins.  
86 They are present all along the water transport pathway from root to stomata. Aquaporins were less  
87 abundant in soybean and pearl millet genotypes that showed a reduced transpiration rate at high  
88  $VPD_{leaf}$  (Sadok and Sinclair, 2010; Devi, Sinclair and Taliércio, 2015; Reddy *et al.*, 2017).

89 Despite the reductions in  $g_s$ , the transpiration rate usually increases with increasing  $VPD_{leaf}$ . Only at  
90 high  $VPD_{leaf}$  significant decreases in transpiration rates have been observed (Franks, Cowan and  
91 Farquhar, 1997; Fletcher, Sinclair and Allen, 2007; Gholipoor *et al.*, 2010; Ryan *et al.*, 2016). These  
92 transpiration responses are commonly described by a segmented pattern where the slope of  
93 transpiration rate versus  $VPD_{leaf}$  is significantly reduced after a specified breakpoint. Significant  
94 differences in segmented transpiration responses to  $VPD_{leaf}$  have been observed across- and within-  
95 species (Fletcher, Sinclair and Allen, 2007; Gholipoor *et al.*, 2010; Ryan *et al.*, 2016). While some  
96 species or genotypes already reduce transpiration rate significantly at low  $VPD_{leaf}$ , others show only a  
97 reduction at higher  $VPD_{leaf}$  or even maintain the increasing transpiration rate. Restricting transpiration  
98 rate at high VPD has been suggested as a key drought tolerance breeding trait as excessive water loss  
99 is avoided and might be saved for later in the growing season (Vadez, 2014; Sinclair *et al.*, 2017).

100 Limiting transpiration above a VPD threshold can increase the daily transpiration efficiency but the  
101 reduced water use may compromise the yield potential. Reduced transpiration limits carbon uptake,  
102 thereby hampering photosynthesis and yield (Richards, 2000; Lee *et al.*, 2020; Eyland *et al.*, 2021).  
103 Moreover, care must be taken that the so-called saved water is not merely lost by evaporation or  
104 transpiration by neighbouring plants.

105 The transpiration rate response to VPD was shown to be highly heritable in wheat (Schoppach *et al.*,  
106 2016). Models predict that in drought-prone environments limiting transpiration at high VPD would  
107 improve maize and soybean yields by maintaining more soil water available later in the season during  
108 flowering or grain filling (Sinclair *et al.*, 2010; Messina *et al.*, 2015). In these drought-prone regions,  
109 the negative effect of  $g_s$  reduction on  $A$  during vegetative growth could be compensated later in the  
110 growing season (Sinclair *et al.*, 2010; Messina *et al.*, 2015). Improved maize hybrids which, amongst  
111 other traits, showed reduced transpiration at high VPD<sub>leaf</sub> indeed increased yields under water-limited  
112 conditions (Gaffney *et al.*, 2015), while for durum wheat cultivars this was only the case under severe  
113 drought conditions (Medina *et al.*, 2019).

114 The current set of edible bananas is complex and has resulted from different parental routes and  
115 several back crosses (De Langhe *et al.*, 2010; Perrier *et al.*, 2011; Martin, Baurens, *et al.*, 2020; Cenci  
116 *et al.*, 2021). The hybrid banana genomes are unbalanced with respect to the parental ones, and inter-  
117 and intra-genome translocation chromosomes are relatively common (Christelová *et al.*, 2017;  
118 Němečková *et al.*, 2018). Most, if not all, cultivars have genomes consisting of different proportions  
119 of A- and B-genome chromosomes and/or recombinant chromosomes originating from different  
120 parents. Similar to other tropical species, bananas are very sensitive to VPD, with reductions in  
121 transpiration when VPD exceeds 2 – 2.3 kPa (Aubert and Catsky, 1970; Carr, 2009; Eyland *et al.*, 2022).  
122 Thomas *et al.* (1998) observed a diverse response in three banana cultivars with different genomic  
123 constitutions. Despite these efforts, the transpiration responses to VPD remain largely  
124 uncharacterized across diverse banana genotypes.

125 The main objective of this work was to evaluate 8 wild banana (sub)species for their stomatal and  
126 transpiration responses under increasing VPD at the leaf and whole-plant level. Transpiration rate  
127 limitations at high VPD have been indicated as a key breeding trait for high water use efficiency. This  
128 work could therefore provide the basis for systematically screening crop wild relatives of banana for  
129 their transpiration at high VPD, with the aim to identify potential parent material for drought tolerance  
130 breeding.

## 131 3 Materials & methods

### 132 3.1 Plant material & growing conditions

133 A diversity panel of 9 wild banana genotypes belonging to 8 (sub)species (Table 1) were phenotyped  
134 for their transpiration response to VPD. Plants were grown in 2.5 L pots filled with peat-based compost  
135 and maintained under well-watered conditions. Plants were grown in the greenhouse for 6 - 8 weeks  
136 before moving to the growth chamber (Bronson PGC-1400, the Netherlands). The growth chamber  
137 contained an air mixing fan and LED panels providing a light intensity of 250  $\mu\text{mol m}^{-2} \text{s}^{-1}$  for a 12 h  
138 photoperiod and a light spectrum with blue:red:far-red ratio of 1 : 1.5 : 0.15. Plants were acclimated  
139 to the growth chamber for one day under a day/night temperature and relative humidity of 27/24.5 °C

140 and 78 %, respectively. The next day the VPD step-changes were initiated by altering relative humidity,  
141 while temperature was maintained at 36 °C during this day. VPD was increased by decreasing relative  
142 humidity as temperature fluctuations would not only affect VPD but also aquaporin conductance and  
143 water viscosity in xylem and mesophyll cells (Matzner and Comstock, 2001; Yang *et al.*, 2012). At light  
144 onset relative humidity was maintained for 90 min at 87 %, after which it was subsequently decreased  
145 to 78, 68, 62 and 56 %, each for 60 min. Average VPDs at each step were 0.77, 1.36, 1.93, 2.34 and  
146 2.64 kPa. Plants were maintained under well-watered conditions by daily watering before light onset.  
147 Measurements were taken before 14:00 to avoid afternoon stomatal closure (van Wesemael *et al.*,  
148 2019; Eyland *et al.*, 2021).

## 149 3.2 Leaf gas exchange measurements

150 Gas exchange responses to step increases in  $VPD_{leaf}$  were measured every 60 s on the middle of the  
151 second youngest fully developed leaf using a LI-6800 infrared gas analyser (LI-COR, USA). Light  
152 intensity and  $CO_2$  concentration were maintained at  $250 \mu mol m^{-2} s^{-1}$  and  $400 \mu mol mol^{-1}$ , respectively.  
153 Leaf temperature was maintained at 36 °C. Relative humidity went from 85 to 75, 65, 55, 45 and 35  
154 %, reaching  $VPD_{leaf}$  of 0.91, 1.50, 2.09, 2.69, 3.28 and 3.87 kPa. Note that measurements were stopped  
155 early if the drying capacity of the infra-red gas exchange system was saturated and unable to maintain  
156 reduced relative humidity. The intrinsic water use efficiency ( $iWUE$ ) was calculated as  $iWUE = A/g_s$  with  
157  $A$  being the photosynthetic rate. At every  $VPD_{leaf}$  level the steady-state  $g_s$ ,  $A$ ,  $E_{rate}$  (transpiration rate)  
158 and  $iWUE$  after 60 min was calculated. The maximum  $g_s$  was calculated as the highest  $g_s$  observed  
159 across all  $VPD_{leaf}$  levels. Segmented regression was performed on the transpiration rate response to  
160 increasing  $VPD_{leaf}$  for each genotype by using a nonlinear mixed effect model in which the intercept  
161 was assumed to vary at individual plant level (segmented R package, Muggeo, 2008). This analysis  
162 calculates the optimal breakpoint in the transpiration response with a different linear response before  
163 and after the breakpoint. To determine the effect of the reduction in stomatal opening on the  
164 transpiration, the transpiration reduction ( $\phi_E$ ) was determined according to Franks *et al.* (1999) and  
165 Ryan *et al.* (2016) (Fig. 1). For each individual, a linear regression was fitted through the transpiration  
166 rate at the first two  $VPD_{leaf}$  levels (0.90 and 1.50 kPa). This linear regression was then extrapolated to  
167 predict the transpiration rate ( $E_{pred}$ ) at higher  $VPD_{leaf}$  levels (2.69, 3.28 and 3.87 kPa) (Fig. 1). The  
168 percentage decrease of the actual measured transpiration rate ( $E_{meas}$ ) compared to  $E_{pred}$  (Fig. 1) was  
169 then quantified at each  $VPD_{leaf}$  level:

$$\phi_E = 1 - \frac{E_{meas}}{E_{pred}} \quad \text{Eq. 1}$$

170

171 The percentage of limitation of the photosynthetic rate ( $A$ ) by  $g_s$  reduction was calculated at every  
172  $VPD_{leaf}$  level by comparing the measured  $A$  ( $A_{meas}$ ) with the overall maximally measured  $A$  ( $A_{max}$ ):

$$\text{Limitation of } A = \frac{\sum(A_{max} - A_{meas})}{\sum A_{meas}} \quad \text{Eq. 2}$$

173 Stomatal reduction ( $\phi_{stom}$ ) with increasing VPD was defined as the absolute slope between stomatal  
174 conductance ( $g_s$ ) and  $\log_e(VPD_{leaf})$  as described by Oren *et al.* (1999):

$$g_s = a - \phi_{stom} \log_e VPD_{leaf} \quad \text{Eq. 3}$$

175 where  $a$  is the estimated  $g_s$  at  $VPD_{leaf}$  1 kPa.

### 176 3.3 Whole-plant transpiration rate

177 Plants were placed on balances (0.01 g accuracy, Kern, Germany) to register their weight every 10 s.  
178 The soil was covered by plastic to avoid evaporation and ensure only water loss through transpiration.  
179 Transpiration during each VPD step was calculated by differentiating 5 min average total weight ( $m_{tot}$ )  
180 at the start of the VPD level with the 5 min average total weight at the end of the VPD level:

$$E_{rate} = \frac{(m_{tot,t2} - m_{tot,t1})}{LA * (t_2 - t_1)} \quad \text{Eq. 4}$$

181 Transpiration was normalized by leaf area (LA) and the time (t) passed. LA was quantified by  
182 destructive leaf area imaging at the end of the experiment.

183 Segmented regression was performed on the transpiration rate response to increasing VPD for each  
184 genotype by using a nonlinear mixed effect model in which the intercept was assumed to vary at plant  
185 level. Transpiration reduction ( $\phi_E$ ) was determined according to Eq. 1 with linear regression between  
186 the two first VPD levels (0.77 and 1.36 kPa) and comparison between  $E_{pred}$  and  $E_{meas}$  at the highest  
187 level (2.64 kPa).

### 188 3.4 Statistics

189 All data processing and statistical analysis were carried out in R (V3.6.2). Genotypic differences were  
190 tested by applying analysis of variance (ANOVA) with a post hoc Benjamini & Hochberg correction.  
191 Significance of the segmented response of transpiration rate to VPD compared to a linear response  
192 was determined by the Davies Test (segmented R package, Muggeo, 2008). K-means clustering of  
193 genotypes was performed on the average scaled output of the segmented regression, the  
194 transpiration reduction, the stomatal reduction and photosynthesis limitation, including  
195 measurements by leaf gas exchange and by whole-plant transpiration were included (Hartigan and  
196 Wong, 1979). Clusters were optimized across 10,000 random sets of cluster centres and plotted on  
197 the first two principal components.

## 198 4 Results

### 199 4.1 Diverse response to VPD: three phenotypic clusters

200 The transpiration response was measured at leaf and whole plant level while relative humidity was  
201 stepwise decreased and VPDs consequently increased. The response to increasing VPD at leaf and  
202 whole-plant level was described by the segmented regression of transpiration rate versus VPD, the  
203 transpiration reduction (Eq. 1), the photosynthetic limitation under increasing VPD (Eq. 2) and the  
204 stomatal reduction (Eq. 3). K-means clustering was performed on the output variables measured by  
205 both leaf gas exchange and whole-plant transpiration (Table 2). Three clusters were identified and  
206 plotted along the first two principal components (Fig. 2). The first principal component was mainly  
207 determined by the limitation of photosynthetic rate (A) at high VPDs and the transpiration reduction  
208 at leaf and whole-plant level (Table 2). Important variables in the second principal component were  
209 the slope before the breakpoint in transpiration rate with increasing VPD and the stomatal reduction  
210 (Table 2). Cluster I consisted of only one genotype: *M. acuminata* ssp. *errans* (Fig. 2). In group II *M.*

211 *acuminata* ssp. *zebrina* and *M. balbisiana* clustered together (Fig. 2). Group III contained 6 genotypes:  
212 *M. acuminata* ssp. *banksii*, ssp. *burmannica*, ssp. *burmannicoides*, ssp. *malaccensis* and ssp.  
213 *microcarpa* (Fig. 2).

## 214 4.2 Leaf level responses of $g_s$ , transpiration rate and $A$ to increasing

### 215 $VPD_{leaf}$

216 With increasing  $VPD_{leaf}$ ,  $g_s$  decreased in all genotypes (Fig. 3A, Supplemental Table S1). The  
217 transpiration rate initially increased, but eventually reached steady-state or even declined (Fig. 3B).  
218 The transpiration rate and  $g_s$  of *M. acuminata* ssp. *errans* were lowest and differed significantly from  
219 all other genotypes at  $VPD_{leaf}$  exceeding 1.50 and 2.09 kPa, respectively (Fig. 3A-B, Supplemental Table  
220 S1). Under a  $VPD_{leaf} \leq 2.9$  kPa, the highest transpiration rates and  $g_s$  were observed for *M. balbisiana*  
221 and *M. acuminata* ssp. *burmannica*. However, when  $VPD_{leaf}$  increased further, the  $g_s$  of *M. balbisiana*  
222 decreased stronger than *M. acuminata* ssp. *burmannica*, translating only in *M. balbisiana* in a lower  
223 transpiration rate (Fig. 3A-B, Supplemental Table S1). As  $g_s$  decreased with increasing  $VPD_{leaf}$ , the  $CO_2$   
224 uptake was limited and  $A$  decreased (Fig. 3C). The lowest  $A$  was observed for *M. acuminata* ssp. *errans*  
225 and ssp. *burmannicoides*, with significantly lower  $A$  compared to all other genotypes except *M.*  
226 *acuminata* ssp. *zebrina* (Fig. 3C, Supplemental Table S1). The intrinsic water use efficiency ( $iWUE$ )  
227 increased with increasing  $VPD_{leaf}$  (Fig. 3D).  $iWUE$  was highest in *M. acuminata* ssp. *errans* and differed  
228 significantly from all other genotypes as  $VPD_{leaf}$  exceeded 1.5 kPa (Fig. 3D, Supplemental Table S4.1).  
229 The lowest  $iWUE$  were observed for *M. acuminata* ssp. *burmannica* and ssp. *burmannicoides* (Fig. 3D).

230 In all genotypes there was a decrease in the slope of transpiration rate versus  $VPD_{leaf}$  (Fig. 3B). This  
231 response was described by a segmented regression with a specified breakpoint after which the slope  
232 of the transpiration rate decreases. A significant breakpoint in transpiration rate in response to  $VPD_{leaf}$   
233 was identified in all genotypes (Fig. 4). Across genotypes the breakpoints ranged between 1.75 and  
234 2.5 kPa with *M. acuminata* ssp. *errans* having a significant breakpoint at the lowest  $VPD_{leaf}$  (Fig. 4, Fig.  
235 5). Two *M. acuminata* ssp. *banksii* genotypes and ssp. *microcarpa* showed the highest breakpoint in  
236 transpiration rate (Fig. 4, Fig. 5). The groups defined by k-means clustering differed in their segmented  
237 transpiration response (Fig. 5). Group I consisted only of *M. acuminata* ssp. *errans*, the genotype with  
238 a breakpoint (a reduction in transpiration rate) at the lowest  $VPD_{leaf}$ , as well as the lowest slope (the  
239 lowest  $E_{rate}$ ) before the breakpoint (Fig. 5). Group II, consisting of *M. acuminata* ssp. *zebrina* and *M.*  
240 *balbisiana*, had a breakpoint at a relatively low  $VPD_{leaf}$  around 2 kPa and a negative slope after the  
241 breakpoint (Fig. 5). This negative slope indicates a net decrease in transpiration rate, which was not  
242 observed in the other genotypes. In group III all genotypes kept relatively high transpiration rates at  
243 relatively high  $VPD_{leaf}$ . *Musa acuminata* ssp. *burmannica*, ssp. *burmannicoides* and ssp. *malaccensis*  
244 had a breakpoint at relatively low  $VPD_{leaf}$ , but maintained a high slope of transpiration rate afterwards  
245 while the *M. acuminata* ssp. *banksii* genotypes and ssp. *microcarpa* showed only a significant  
246 breakpoint in transpiration rate at higher  $VPD_{leaf}$  (Fig. 5).

247 The transpiration reduction ( $\phi_E$ ) (Eq. 1, Fig. 1) representing the increase in stomatal resistance with  
248 increasing  $VPD_{leaf}$  also differed significantly across genotypes (Fig. 6A, Supplemental Table S2).  
249 Reductions in transpiration ranged between 37 and 59 % at the highest  $VPD_{leaf}$  of 3.87 kPa (Fig. 6A,  
250 Supplemental Table S2). The highest reductions in transpiration were observed for *M. acuminata* ssp.  
251 *errans*, ssp. *zebrina* and *M. balbisiana* (Fig. 6A). The transpiration reduction of group I and II was  
252 significantly higher compared to group III at all  $VPD_{leaf}$  levels (Fig. 6A, Supplemental Table S2).

253 The decrease in stomatal opening with increasing  $VPD_{leaf}$  limited the photosynthetic rate ( $A$ ). In all  
254 genotypes there was a significant increase in the limitation of  $A$  with increasing  $VPD_{leaf}$  ( $P < 0.01$ ) and  
255 the limitation ranged from 7 to 17 % at the highest  $VPD_{leaf}$  level (Fig. 6B, Supplemental Table S3). The  
256 limitation of  $A$  was highest in *M. acuminata* ssp. *errans* from  $VPD_{leaf}$  2.69 kPa onwards, followed by *M.*  
257 *acuminata* ssp. *zebrina* and *M. balbisiana* (Fig. 6B, Supplemental Table S3). The limitation of  $A$  was  
258 significantly higher in group I compared to group II and III from  $VPD_{leaf}$  2.69 kPa onwards (Supplemental  
259 Table S3). At  $VPD_{leaf}$  of 3.28 and 3.87 kPa group II had a significantly higher  $A$  limitation compared to  
260 group III (Supplemental Table S3). Across genotypes the limitation of  $A$  at higher  $VPD_{leaf}$  ( $\geq 2.69$  kPa)  
261 was significantly correlated to the breakpoint in transpiration rate ( $R^2 = 0.47-0.57$ ; Supplemental Fig.  
262 S1). Similarly, the limitation of  $A$  and the transpiration reduction at higher  $VPD_{leaf}$  ( $\geq 2.69$  kPa) were  
263 significantly correlated ( $R^2 = 0.53-0.58$ ; Supplemental Fig. S1). These correlations indicate that strong  
264 reductions in transpiration at high  $VPD_{leaf}$  result in higher  $A$  limitations.

265 The stomatal reduction ( $\phi_{stom}$ ), defined as the slope of  $g_s$  versus  $\log_e(VPD_{leaf})$  (Eq. 3) differed  
266 significantly across genotypes (Supplemental Table S4). Highest stomatal reduction was observed in  
267 *M. balbisiana*, while *M. acuminata* ssp. *errans* showed lowest reduction (Fig. 7, Supplemental Table  
268 S4). The stomatal reduction was strongly correlated to the maximum observed  $g_s$  ( $R^2 = 0.88$ , Fig. 7,  
269 Supplemental Fig. S1). No significant differences across previously described groups was observed  
270 (Supplemental Table S4).

### 271 4.3 Whole-plant transpiration rate responses corroborate leaf 272 measurements

273 The whole-plant transpiration rate increased between 98 and 197 % with increasing VPD (Fig. 8). The  
274 lowest transpiration rates were observed for *M. acuminata* ssp. *errans* with significant differences  
275 compared to all other genotypes from VPD 1.93 kPa and beyond (Fig. 8, Supplemental Table S5).  
276 Transpiration rates of all other genotypes were double compared to *M. acuminata* ssp. *errans* at the  
277 highest VPD level (Fig. 8, Supplemental Table S5).

278 A significant breakpoint in whole-plant transpiration rate response to VPD was identified in all  
279 genotypes (Fig. 9). The breakpoints ranged between 1.6 and 2.2 kPa, with *M. acuminata* ssp. *errans*  
280 and *M. balbisiana* having the lowest breakpoint (Fig. 9, Fig. 10). The slope after the breakpoint was  
281 strongly negative in *M. acuminata* ssp. *errans* and ssp. *zebrina* (Fig. 9, Fig. 10). Genotypes belonging  
282 to group I or II thus showed breakpoints in transpiration rate at lower VPD values and/or strongly  
283 negative second slopes (Fig. 10).

284 The whole-plant transpiration reduction ( $\phi_E$ ) (Eq. 1, Fig. 1) of *M. acuminata* ssp. *errans* was  
285 significantly higher compared to all other genotypes (Fig. 11, Supplemental Table S6). The second  
286 highest transpiration reduction was observed for *M. acuminata* ssp. *zebrina* and *M. balbisiana* (Fig.  
287 11, Supplemental Table S6). Group I (*M. acuminata* ssp. *errans*) showed a significantly higher  
288 transpiration reduction compared to group II and III (Supplemental Table S6). Group II (*M. acuminata*  
289 ssp. *zebrina* and *M. balbisiana*) showed a significantly higher transpiration reduction compared to  
290 group III (*Musa acuminata* ssp. *burmannica*, ssp. *burmannicoides*, ssp. *malaccensis*, ssp. *banksii* and  
291 ssp. *microcarpa*) (Supplemental Table S6).

292 The whole-plant transpiration reduction was significantly correlated to the transpiration reduction  
293 measured at leaf level at similar VPD ( $R^2 = 0.52$ , Fig. 11, Supplemental Fig. S1). Similarly, the whole-



294 plant transpiration reduction was significantly correlated to the limitation of  $A$  measured at leaf level  
295 for  $VPD_{leaf}$  exceeding 2.1 kPa ( $R^2 = 0.50 - 0.73$ , Supplemental Fig. S1).

## 296 5 Discussion

297 Diversity in transpiration patterns with increasing VPD has been observed among different genotypes  
298 of many crops including chickpea, maize, peanut, pearl millet, sorghum and soybean (Fletcher, Sinclair  
299 and Allen, 2007; Gholipour *et al.*, 2010; Jyostna Devi, Sinclair and Vadez, 2010; Kholová *et al.*, 2010;  
300 Yang *et al.*, 2012; Ryan *et al.*, 2016; Sivasakthi *et al.*, 2017). We observed a significant change in the  
301 transpiration rate of 9 wild banana genotypes already at VPD levels between 1.6 and 2.5 kPa (Fig. 4,  
302 Fig. 9). These values are in line with the general transpiration rate reduction of banana at VPD 2 to 2.3  
303 kPa reported by Carr (2009) and the modelled VPD responses of (Eyland *et al.*, 2022). The breakpoints  
304 in transpiration rate were at similar VPDs compared to other crops (Gholipour *et al.*, 2010; Yang *et al.*,  
305 2012; Ryan *et al.*, 2016). However, in other crops several genotypes were identified without a  
306 breakpoint as they maintained a linear increase in transpiration rate with increasing VPD (Fletcher,  
307 Sinclair and Allen, 2007; Gholipour *et al.*, 2010; Jyostna Devi, Sinclair and Vadez, 2010; Kholová *et al.*,  
308 2010; Yang *et al.*, 2012; Ryan *et al.*, 2016; Sivasakthi *et al.*, 2017). Moreover, temperature and other  
309 environmental factors like radiation and soil water potential have been shown to interact with VPD in  
310 banana (Eyland *et al.*, 2022). These complex interactions explain why a fixed VPD level per genotype,  
311 where a reduction in transpiration takes place, cannot be defined without taking the other  
312 environmental conditions in account.

313 The wild banana genotypes clustered in three groups based on their leaf gas exchange and whole-  
314 plant transpiration response to VPD (Fig. 2). Genotypes of group I and II, *M. acuminata ssp. errans*, *M.*  
315 *acuminata ssp. zebrina* and *M. balbisiana*, showed the highest transpiration rate limitations. This is in  
316 line with our previous observations under fluctuating conditions: *M. balbisiana* showed together with  
317 *M. acuminata ssp. errans* the most pronounced response by strongly decreasing their transpiration  
318 rate (Eyland *et al.*, 2022). As reported by Oren *et al.* (1999), the stomatal reduction was significantly  
319 correlated to the maximum  $g_s$  (Fig. 7, Supplemental Fig. 1). This indicates that genotypes with higher  
320  $g_s$  under low  $VPD_{leaf}$  show higher stomatal closure at increasing  $VPD_{leaf}$ . However, *M. acuminata ssp.*  
321 *errans* (group I) showed a very strong stomatal response, despite its low  $g_s$ . As a consequence of this  
322 strong stomatal restriction, the  $\delta WUE$  of *M. acuminata ssp. errans* was significantly higher compared  
323 to all other genotypes (Fig. 3D). In contrast to the very conservative behaviour of *M. acuminata ssp.*  
324 *errans*, the genotypes of group II displayed high  $g_s$  and  $A$  when  $VPD_{leaf}$  was favourable in addition to  
325 early or strong transpiration rate reductions at high  $VPD_{leaf}$ . This behaviour is assumed to be beneficial  
326 in drought-prone areas with periods of high VPD (Sadok and Sinclair, 2010; Vadez, 2014), as water is  
327 used efficiently and saved for later in the growing season. Some genotypes of group III also showed a  
328 breakpoint in transpiration at a relatively low  $VPD_{leaf}$ , but a high transpiration rate was kept and a net  
329 transpiration increase continued with rising  $VPD_{leaf}$  (Fig. 4, Fig. 5). Hence, these genotypes display a  
330 more risk taking behaviour, thereby risking hydraulic failure (Sade, Gebremedhin and Moshelion,  
331 2012).

332 The transpiration reduction at leaf level was significantly correlated to the reduction at whole-plant  
333 level, suggesting similar responses to increasing VPD (Fig. 11). The conservative behaviour of  
334 genotypes of group I and group II was validated at the whole-plant level by breakpoints in transpiration  
335 rate at low VPDs and/or low increases in transpiration afterwards (Fig. 5, Fig. 9).

336 As demonstrated in other crops, identification of this conservative behaviour towards VPD, opens up  
337 possibilities to improve drought tolerance of cultivated banana hybrids. *M. balbisiana* is a parent to  
338 many edible bananas belonging to the AAB, ABB and AB genome groups and their subgroups. In line  
339 with the conservative behaviour of *M. balbisiana* in response to VPD (Fig 3-4, Fig 6, Fig 8), it has been  
340 indicated in many studies that edible bananas with a high portion of B genes are related to drought  
341 tolerance (Ekanayake, Ortiz and Vuylsteke, 1994; Thomas, Turner and Eamus, 1998; Turner and  
342 Thomas, 1998; Thomas and Turner, 2001; Vanhove *et al.*, 2012; Kissel *et al.*, 2015; Van Wesemael *et*  
343 *al.*, 2018; van Wesemael *et al.*, 2019; Eyland *et al.*, 2021, 2022; Uwimana *et al.*, 2021). Also *M.*  
344 *acuminata ssp. zebrina* is a parent to several edible bananas (Carreel *et al.*, 2002; Perrier *et al.*, 2011;  
345 Němečková *et al.*, 2018; Baurens *et al.*, 2019; Martin, Baurens, *et al.*, 2020; Martin, Cardi, *et al.*, 2020;  
346 Jeensae *et al.*, 2021), among others the East-African highland banana subgroup (i.e. Mutika/Lujugira).  
347 The East-African highland banana subgroup, endemic to the East-African highlands, is due to its risk  
348 taking behaviour sensitive to drought (Kissel *et al.*, 2015; van Wesemael *et al.*, 2019; Eyland *et al.*,  
349 2021; Uwimana *et al.*, 2021). Hence, identification of drought tolerance traits in *M. acuminata ssp.*  
350 *zebrina* populations provides opportunities to mitigate climate change impacts in this and all other  
351 important subgroups. So far, not much is known about the contribution of *M. acuminata ssp. errans*  
352 to edible bananas. The accession screened in this study and representing *M. acuminata ssp. errans*,  
353 has been proved to be complex in genome with ancestries coming from ‘malaccensis’, ‘zebrina’ and  
354 ‘burmannica/siamea’ (Martin, Cardi, *et al.*, 2020).

## 355 6 Conclusion

356 The reduction of transpiration response to high VPD is a key trait for water saving and diversity among  
357 wild banana relatives was observed. Reductions in transpiration ranging between 37 and 59 %,   
358 translated in an increased WUE of 54 to 166 %. *M. acuminata ssp. errans*, on the one hand, responded  
359 most conservative, but was also characterized by low  $g_s$  overall. *M. acuminata ssp. zebrina* and *M.*  
360 *balbisiana*, on the other hand, showed strong stomatal closure while maintaining relatively high  
361 carbon uptake under low VPD. These two genotypes thus show favourable responses for a specific  
362 sub-trait linked to high water use efficiency, providing a potential basis for identification of parent  
363 material for drought tolerance breeding.

## 364 7 Supplementary data

365 **Table S1:** Genotype-specific steady state response of  $g_s$ ,  $E_{rate}$ ,  $A$  and  $iWUE$  at increasing VPD

366 **Table S2:** Genotype-specific transpiration reduction at increasing VPD

367 **Table S3:** Genotype-specific photosynthetic rate limitation at increasing VPD

368 **Table S4:** Genotype-specific stomatal reduction

369 **Table S5:** Genotype-specific whole-plant transpiration rate at increasing VPD

370 **Table S6:** Genotype-specific whole-plant transpiration reduction

371 **Fig. S1:** Correlation matrix leaf and whole-plant traits

## 372 8 Acknowledgements

373 The authors would like to thank Edwige Andre for the plant propagation; Hendrik Siongers, Stan  
374 Blomme, Loïck Derette and Poi Verwilt for their technical assistance during plant growth and  
375 phenotyping.

## 376 9 Author contributions

377 SC and RS wrote the concepts for funding. DE performed the experiments and analyzed the data. SC  
378 supervised the experiments. SC, CG and DE wrote the manuscript. All authors reviewed and approved  
379 the final manuscript.

## 380 10 Conflict of interest

381 The authors declare no conflicts of interest.

## 382 11 Funding

383 This study was undertaken as part of the initiative ‘Adapting Agriculture to Climate Change: Collecting,  
384 Protecting and Preparing Crop Wild Relatives’ which is supported by the Government of Norway. The  
385 project is managed by the Global Crop Diversity Trust in partnership with national and international  
386 gene banks and plant breeding institutes around the world <http://www.cwrdiversity.org/>. DE was  
387 supported by a scholarship funded by the Global TRUST foundation project ‘Crop Wild Relatives  
388 Evaluation of drought tolerance in wild bananas from Papua New Guinea’ [Grant number: GS15024].  
389 CG was supported by a PhD scholarship funded by the Belgian Development Cooperation project  
390 “More fruit for food security: developing climate-smart bananas for the African Great Lakes region”.  
391 The authors thank all donors who supported this work also through their contributions to the CGIAR  
392 Fund (<http://www.cgiar.org/who-we-are/cgiar-fund/fund-donors-2/>), and in particular to the CGIAR  
393 Research Program Roots, Tubers and Bananas (RTB-CRP) and to the ERA-Net transnational call  
394 European Research Projects LEAP Agri H2020 cofund project on food & nutrition security & sustainable  
395 agriculture, with funding from national funding agencies for the Project ‘PHENOTYPING THE BANANA  
396 BIODIVERSITY TO IDENTIFY CLIMATE SMART VARIETIES WITH OPTIMAL MARKET POTENTIAL IN AFRICA  
397 AND EUROPE’.

## 398 12 Data availability

399 All data supporting the findings of this study are available within the paper and within its  
400 supplementary materials published online

## 13 References

- Aubert, B. and Catsky, J. (1970) 'The onset of photosynthetic CO<sub>2</sub> influx in banana leaf segments as related to stomatal diffusion resistance at different air humidities', *Photosynthetica*, 4(3), pp. 254–256.
- Bauer, H. et al. (2013) 'The stomatal response to reduced relative humidity requires guard cell-autonomous ABA synthesis', *Current Biology*, 23(1), pp. 53–57. doi: 10.1016/j.cub.2012.11.022.
- Baurens, F. C. et al. (2019) 'Recombination and large structural variations shape interspecific edible bananas genomes', *Molecular Biology and Evolution*, 36(1), pp. 97–111. doi: 10.1093/molbev/msy199.
- Breshears, D. D. et al. (2013) 'The critical amplifying role of increasing atmospheric moisture demand on tree mortality and associated regional die-off', *Frontiers in Plant Science*, 4(266). doi: 10.3389/fpls.2013.00266.
- Brodribb, T. J. and Jordan, G. J. (2008) 'Internal coordination between hydraulics and stomatal control in leaves', *Plant, Cell & Environment*, 31(11), pp. 1557–1564. doi: 10.1111/j.1365-3040.2008.01865.x.
- Carr, M. K. V. (2009) 'The water relations and irrigation requirements of banana (*Musa* spp.)', *Experimental Agriculture*, 45(3), pp. 333–371. doi: 10.1017/S001447970900787X.
- Carreel, F. et al. (2002) 'Ascertaining maternal and paternal lineage within *Musa* by chloroplast and mitochondrial DNA RFLP analyses', *Genome*, 45(4), pp. 679–692. doi: 10.1139/g02-033.
- Cenci, A. et al. (2021) 'Unravelling the complex story of intergenomic recombination in ABB allotriploid bananas', *Annals of Botany*, 127(1), pp. 7–20. doi: 10.1093/aob/mcaa032.
- Challinor, A. J. and Wheeler, T. R. (2008) 'Crop yield reduction in the tropics under climate change: Processes and uncertainties', *Agricultural and Forest Meteorology*, 148(3), pp. 343–356. doi: 10.1016/j.agrformet.2007.09.015.

Choudhary, S. et al. (2014) 'Hydraulic conductance of maize hybrids differing in transpiration response to vapor pressure deficit', *Crop Science*, 54(3), pp. 1147–1152. doi: 10.2135/cropsci2013.05.0303.

Christelová, P. et al. (2017) 'Molecular and cytological characterization of the global *Musa* germplasm collection provides insights into the treasure of banana diversity', *Biodiversity and Conservation*, 26(4), pp. 801–824. doi: 10.1007/s10531-016-1273-9.

Dai, Z., Edwards, G. E. and Ku, M. S. B. (1992) 'Control of photosynthesis and stomatal conductance in *Ricinus communis* L. (castor bean) by leaf to air vapor pressure deficit', *Plant Physiology*, 99(4), pp. 1426–1434. doi: 10.1104/pp.99.4.1426.

Devi, M. J., Sinclair, T. R. and Taliercio, E. (2015) 'Comparisons of the effects of elevated vapor pressure deficit on gene expression in leaves among two fast-wilting and a slow-wilting soybean', *PLoS ONE*, 10(10), pp. 1–21. doi: 10.1371/journal.pone.0139134.

Ekanayake, I. J., Ortiz, R. and Vuylsteke, D. R. (1994) 'Influence of leaf age, soil moisture, VPD and time of day on leaf conductance of various *Musa* genotypes in a humid forest-moist savanna transition site', *Annals of Botany*, 74, pp. 173–178.

Eyland, D. et al. (2021) 'The impact of slow stomatal kinetics on photosynthesis and water use efficiency under fluctuating light', *Plant Physiology*, 186(2), pp. 998–1012. doi: 10.1093/plphys/kiab114.

Eyland, D. et al. (2022) 'High-throughput phenotyping reveals differential transpiration behaviour within the banana wild relatives highlighting diversity in drought tolerance', *Plant Cell and Environment*, 45(6), pp. 1647–1663. doi: 10.1111/pce.14310.

Ficklin, D. L. and Novick, K. A. (2017) 'Historic and projected changes in vapor pressure deficit suggest a continental-scale drying of the United States atmosphere', *Journal of Geophysical Research*, 122(4), pp. 2061–2079. doi: 10.1002/2016JD025855.

Fletcher, A. L., Sinclair, T. R. and Allen, L. H. (2007) 'Transpiration responses to vapor pressure deficit in well watered "slow-wilting" and commercial soybean', *Environmental and Experimental Botany*, 61(2), pp. 145–151. doi: 10.1016/j.envexpbot.2007.05.004.

Franks, P. J., Cowan, I. R. and Farquhar, G. D. (1997) 'The apparent feedforward response of stomata to air vapour pressure deficit: Information revealed by different experimental procedures with two rainforest trees', *Plant, Cell and Environment*, 20(1), pp. 142–145. doi: 10.1046/j.1365-3040.1997.d01-14.x.

Franks, P. J. and Farquhar, G. D. (1999) 'A relationship between humidity response, growth form and photosynthetic operating point in C3 plants', *Plant, Cell and Environment*, 22(11), pp. 1337–1349. doi: 10.1046/j.1365-3040.1999.00494.x.

Gaffney, J. et al. (2015) 'Industry-scale evaluation of maize hybrids selected for increased yield in drought-stress conditions of the US corn belt', *Crop Science*, 55(4), pp. 1608–1618. doi: 10.2135/cropsci2014.09.0654.

Gholipour, M. et al. (2010) 'Genetic variability of transpiration response to vapor pressure deficit among sorghum genotypes', *Field Crops Research*, 119, pp. 85–90. doi: 10.1016/j.fcr.2010.06.018.

Grossiord, C. et al. (2020) 'Plant responses to rising vapor pressure deficit', *New Phytologist*, 226(6), pp. 1550–1566. doi: 10.1111/nph.16485.

Hartigan, J. A. and Wong, M. A. (1979) 'Algorithm AS 136: A K-Means Clustering Algorithm', *Applied Statistics*, 28(1), p. 100. doi: 10.2307/2346830.

Hatfield, J. L. and Prueger, J. H. (2015) 'Temperature extremes: Effect on plant growth and development', *Weather and Climate Extremes*, 10, pp. 4–10. doi: 10.1016/j.wace.2015.08.001.

IPCC et al. (2021) *Climate Change 2021: The Physical Science Basis. Contribution of Working Group I to the Sixth Assessment Report of the Intergovernmental Panel on Climate Change*. Edited by R. Yu and B. Zhou. Cambridge University Press.

Jeensae, R. et al. (2021) 'Cultivar specific gene pool may play an important role in *Musa acuminata* Colla evolution', *Genetic Resources and Crop Evolution*, 68(4), pp. 1589–1601. doi: 10.1007/s10722-020-01088-y.

Jyostna Devi, M., Sinclair, T. R. and Vadez, V. (2010) 'Genotypic variation in peanut for transpiration response to vapor pressure deficit', *Crop Science*, 50(1), pp. 191–196. doi: 10.2135/cropsci2009.04.0220.

Kholová, J. et al. (2010) 'Terminal drought-tolerant pearl millet [*Pennisetum glaucum* (L.) R. Br.] have high leaf ABA and limit transpiration at high vapour pressure deficit', *Journal of Experimental Botany*. doi: 10.1093/jxb/erq013.

Kissel, E. et al. (2015) 'Transpiration efficiency versus growth: exploring the banana biodiversity for drought tolerance', *Scientia Horticulturae*, 185, pp. 175–182. doi: 10.1016/j.scienta.2015.01.035.

Kuromori, T., Sugimoto, E. and Shinozaki, K. (2014) 'Intertissue signal transfer of abscisic acid from vascular cells to guard cells', *Plant Physiology*, 164(4), pp. 1587–1592. doi: 10.1104/pp.114.235556.

De Langhe, E. et al. (2010) 'Did backcrossing contribute to the origin of hybrid edible bananas?', *Annals of Botany*, 106(6), pp. 849–857. doi: 10.1093/aob/mcq187.

Lawrence, M. G. (2005) 'The relationship between relative humidity and the dewpoint temperature in moist air: A simple conversion and applications', *Bulletin of the American Meteorological Society*, 86(2), pp. 225–234. doi: 10.1175/BAMS-86-2-225.

Lee, Y. H. et al. (2020) 'The effect of concurrent elevation in CO<sub>2</sub> and temperature on the growth, photosynthesis, and yield of potato crops', *PLoS ONE*, 15(10), pp. 1–20. doi: 10.1371/journal.pone.0241081.

Lobell, D. B. et al. (2013) 'The critical role of extreme heat for maize production in the United States', *Nature Climate Change*, 3(5), pp. 497–501. doi: 10.1038/nclimate1832.

Martin, G., Baurens, F. C., et al. (2020) 'Chromosome reciprocal translocations have accompanied subspecies evolution in bananas', *Plant Journal*, 104(6), pp. 1698–1711. doi: 10.1111/tpj.15031.

Martin, G., Cardi, C., et al. (2020) 'Genome ancestry mosaics reveal multiple and cryptic contributors to cultivated banana', *Plant Journal*, 102(5), pp. 1008–1025. doi: 10.1111/tpj.14683.

Matzner, S. and Comstock, J. (2001) 'The temperature dependence of shoot hydraulic resistance: Implications for stomatal behaviour and hydraulic limitation', *Plant, Cell and Environment*, 24(12), pp. 1299–1307. doi: 10.1046/j.0016-8025.2001.00785.x.

McAdam, S. A. M. and Brodribb, T. J. (2015) 'The evolution of mechanisms driving the stomatal response to vapor pressure deficit', *Plant Physiology*, 167(3), pp. 833–843. doi: 10.1104/pp.114.252940.

McAdam, S. A. M. and Brodribb, T. J. (2016) 'Linking turgor with ABA biosynthesis: Implications for stomatal responses to vapor pressure deficit across land plants', *Plant Physiology*, 171(3), pp. 2008–2016. doi: 10.1104/pp.16.00380.

McAdam, S. A. M., Sussmilch, F. C. and Brodribb, T. J. (2016) 'Stomatal responses to vapour pressure deficit are regulated by high speed gene expression in angiosperms', *Plant, Cell & Environment*, 39(3), pp. 485–491. doi: 10.1111/pce.12633.

Medina, S. et al. (2019) 'The plant-transpiration response to vapor pressure deficit (VPD) in durum wheat is associated with differential yield performance and specific expression of genes involved in primary metabolism and water transport', *Frontiers in Plant Science*, 9(1994), pp. 1–19. doi: 10.3389/fpls.2018.01994.

Messina, C. D. et al. (2015) 'Limited-transpiration trait may increase maize drought tolerance in the US corn belt', *Agronomy Journal*, 107(6), pp. 1978–1986. doi: 10.2134/agronj15.0016.

Monteith, J. L. (1995) 'A reinterpretation of stomatal responses to humidity', *Plant, Cell and Environment*, 18(4), pp. 357–364. doi: 10.1111/j.1365-3040.1995.tb00371.x.

Monteith, J. L. and Unsworth, M. H. (2013) 'Properties of gases and liquids', in Monteith, J. L. and Unsworth, M. H. (eds) *Principles of Environmental Physics*. 4th edn. Boston: Elsevier, pp. 5–23. doi: 10.1016/B978-0-12-386910-4.00002-0.

Muggeo, V. M. R. (2008) 'Segmented: an R package to fit regression models with broken-line relationships', *R news*, pp. 20–25.

Němečková, A. et al. (2018) 'Molecular and cytogenetic study of East African Highland Banana', *Frontiers in Plant Science*, 9(October), pp. 1–13. doi: 10.3389/fpls.2018.01371.

Ocheltree, T. W., Nippert, J. B. and Prasad, P. V. V. (2014) 'Stomatal responses to changes in vapor pressure deficit reflect tissue-specific differences in hydraulic conductance', *Plant, Cell & Environment*, 37, pp. 132–139. doi: 10.1111/pce.12137.



Oren, R. et al. (1999) 'Survey and synthesis of intra-and interspecific variation in stomatal sensitivity to vapour pressure deficit', *Plant, Cell & Environment*, 22(12), pp. 1515–1526. doi: 10.1046/j.1365-3040.1999.00513.x.

Perrier, X. et al. (2011) 'Multidisciplinary perspectives on (*Musa* spp.) domestication', *Proceedings of the National Academy of Sciences of the United States of America*, 108(28), pp. 11311–11318. doi: 10.1073/pnas.1102001108.

Reddy, P. S. et al. (2017) 'Molecular cloning and expression analysis of Aquaporin genes in pearl millet [*Pennisetum glaucum* (L) R. Br.] genotypes contrasting in their transpiration response to high vapour pressure deficits', *Plant Science*, 265, pp. 167–176. doi: 10.1016/j.plantsci.2017.10.005.

Richards, R. A. (2000) 'Selectable traits to increase crop photosynthesis and yield of grain crops', *Journal of Experimental Botany*, 51(SPEC. ISS.), pp. 447–458. doi: 10.1093/jexbot/51.suppl\_1.447.

Ryan, A. C. et al. (2016) 'Gravimetric phenotyping of whole plant transpiration responses to atmospheric vapour pressure deficit identifies genotypic variation in water use efficiency', *Plant Science*, 251, pp. 101–109. doi: 10.1016/j.plantsci.2016.05.018.

Sack, L., John, G. P. and Buckley, T. N. (2018) 'ABA accumulation in dehydrating leaves is associated with decline in cell volume, not turgor pressure', *Plant Physiology*, 176(1), pp. 489–493. doi: 10.1104/pp.17.01097.

Sade, N., Gebremedhin, A. and Moshelion, M. (2012) 'Risk-taking plants: anisohydric behavior as a stress-resistance trait.', *Plant signaling & behavior*, 7(7), pp. 767–770. doi: 10.4161/psb.20505.

Sadok, W. and Sinclair, T. R. (2010) 'Genetic variability of transpiration response of soybean [*Glycine max* (L.) Merr.] shoots to leaf hydraulic conductance inhibitor AgNO<sub>3</sub>', *Crop Science*, 50, pp. 1423–1430. doi: 10.2135/cropsci2009.10.0575.

Schoppach, R. et al. (2016) 'High resolution mapping of traits related to whole-plant transpiration under increasing evaporative demand in wheat', *Journal of Experimental Botany*, 67(9), pp. 2847–2860. doi: 10.1093/jxb/erw125.

Sinclair, T. R. et al. (2010) 'Assessment across the United States of the benefits of altered soybean drought traits', *Agronomy Journal*, 102(2), pp. 475–482. doi: 10.2134/agronj2009.0195.

Sinclair, T. R. et al. (2017) 'Limited-transpiration response to high vapor pressure deficit in crop species', *Plant Science*, 260, pp. 109–118. doi: 10.1016/j.plantsci.2017.04.007.

Sivasakthi, K. et al. (2017) 'Chickpea genotypes contrasting for vigor and canopy conductance also differ in their dependence on different water transport pathways', *Frontiers in Plant Science*, 8(1663), pp. 1–16. doi: 10.3389/fpls.2017.01663.

Thomas, D. S. and Turner, D. W. (2001) 'Banana (*Musa* sp.) leaf gas exchange and chlorophyll fluorescence in response to soil drought, shading and lamina folding', *Scientia Horticulturae*, 90(1–2), pp. 93–108. doi: 10.1016/S0304-4238(00)00260-0.

Thomas, D. S., Turner, D. W. and Eamus, D. (1998) 'Independent effects of the environment on the leaf gas exchange of three banana (*Musa* sp.) cultivars of different genomic constitution', *Scientia Horticulturae*, 75(1–2), pp. 41–57. doi: 10.1016/S0304-4238(98)00114-9.

Turner, D. W. and Thomas, D. S. (1998) 'Measurements of plant and soil water status and their association with leaf gas exchange in banana (*Musa* spp.): a laticiferous plant', *Scientia Horticulturae*, 77(3–4), pp. 177–193. doi: 10.1016/S0304-4238(98)00168-X.

Uwimana, B. et al. (2021) 'Effect of seasonal drought on the agronomic performance of four banana genotypes (*Musa* spp.) in the east african highlands', *Agronomy*, 11(1). doi: 10.3390/agronomy11010004.

Vadez, V. (2014) 'Root hydraulics: The forgotten side of roots in drought adaptation', *Field Crops Research*, 165, pp. 15–24. doi: 10.1016/j.fcr.2014.03.017.

Vanhove, A.-C. et al. (2012) 'Screening the banana biodiversity for drought tolerance: can an in vitro growth model and proteomics be used as a tool to discover tolerant varieties and understand homeostasis', *Frontiers in Plant Science*, 3, pp. 1–10. doi: 10.3389/fpls.2012.00176.

van Wesemael, J. et al. (2019) 'Using growth and transpiration phenotyping under controlled conditions to select water efficient banana genotypes', *Frontiers in Plant Science*, 10, pp. 1–14. doi: 10.3389/fpls.2019.00352.

Van Wesemael, J. et al. (2018) 'Homeolog expression analysis in an allotriploid non-model crop via integration of transcriptomics and proteomics', *Scientific Reports*, 8(1), pp. 1–11. doi: 10.1038/s41598-018-19684-5.

Williams, A. P. et al. (2013) 'Temperature as a potent driver of regional forest drought stress and tree mortality', *Nature Climate Change*, 3(3), pp. 292–297. doi: 10.1038/nclimate1693.

Xie, X. et al. (2006) 'The identification of genes involved in the stomatal response to reduced atmospheric relative humidity', *Current Biology*, 16(9), pp. 882–887. doi: 10.1016/j.cub.2006.03.028.

Yang, Z. et al. (2012) 'Temperature effect on transpiration response of maize plants to vapour pressure deficit', *Environmental and Experimental Botany*, 78, pp. 157–162. doi: 10.1016/j.envexpbot.2011.12.034.

Zhang, Y. J. et al. (2013) 'Midday stomatal conductance is more related to stem rather than leaf water status in subtropical deciduous and evergreen broadleaf trees', *Plant, Cell and Environment*, 36(1), pp. 149–158. doi: 10.1111/j.1365-3040.2012.02563.x.

## 14 Tables

**Table 1:** Wild banana genotypes screened for their transpiration response to increasing vapour pressure deficit (VPD) at both leaf and whole-plant level.

| Name           | Subspecies                                       | ITC or collection code <sup>1</sup> | Origin <sup>2</sup>                                                                       | Collection site <sup>3</sup> | Collection coordinates <sup>3</sup> |
|----------------|--------------------------------------------------|-------------------------------------|-------------------------------------------------------------------------------------------|------------------------------|-------------------------------------|
| Balbisiana     | <i>Musa balbisiana</i>                           | /                                   | Southeast China, northern Indo-Burma, Southwest India, Sri Lanka, Philippines, New Guinea | Japan (Amami)                | /                                   |
| Banksii_11     | <i>Musa acuminata</i> ssp. <i>banksii</i>        | SJP416                              | New Guinea                                                                                | Papua New Guinea (Madang)    | 5° 37' 8" S<br>145° 28' 7" E        |
| Banksii_17     | <i>Musa acuminata</i> ssp. <i>banksii</i>        | SJP814                              | New Guinea                                                                                | Papua New Guinea (Morobe)    | 6° 44' 42" S<br>146° 43' 51" E      |
| Burmannica     | <i>Musa acuminata</i> ssp. <i>burmannica</i>     | ITC0283                             | southern Indo-Burma                                                                       | /                            | /                                   |
| Burmannicoides | <i>Musa acuminata</i> ssp. <i>burmannicoides</i> | ITC0249                             | southern Indo-Burma                                                                       | /                            | /                                   |
| Errans         | <i>Musa acuminata</i> ssp. <i>errans</i>         | ITC1028                             | Philippines                                                                               | /                            | /                                   |
| Malaccensis_33 | <i>Musa acuminata</i> ssp. <i>malaccensis</i>    | 928533                              | Sumatra and Malayan Peninsula                                                             | Malaysia (Pahang)            | 3°53'51" N<br>102°12'23"E           |
| Microcarpa     | <i>Musa acuminata</i> ssp. <i>microcarpa</i>     | ITC0253                             | Borneo                                                                                    | /                            | /                                   |
| Zebrina        | <i>Musa acuminata</i> ssp. <i>zebrina</i>        | ITC1177                             | Sumatra and Malayan Peninsula                                                             | /                            | /                                   |

<sup>1</sup>Genotypes without ITC code were collected germplasm and not yet available at the International Transit Centre (ITC) collection. The collection code represents the given code to the mother plant during collection. <sup>2</sup>Genotype origin as described by Janssens et al. (2016). <sup>3</sup>Only locations of collected samples are shown.

**Table 2:** Variables included in the k-means clustering and their principal component (PC) loadings.

| Variable <sup>1</sup>                         | Measurement level         | PC1 loading <sup>2</sup> | PC2 loading |
|-----------------------------------------------|---------------------------|--------------------------|-------------|
| Limitation of A at 3.87 kPa                   | Leaf gas exchange         | -0.35                    | 0.08        |
| Limitation of A at 3.28 kPa                   | Leaf gas exchange         | -0.34                    | 0.13        |
| Transpiration reduction at 2.69 kPa           | Leaf gas exchange         | -0.34                    | -0.14       |
| Limitation of A at 2.69 kPa                   | Leaf gas exchange         | -0.32                    | 0.23        |
| Transpiration reduction at 3.28 kPa           | Leaf gas exchange         | -0.32                    | -0.24       |
| Transpiration reduction at 3.87 kPa           | Leaf gas exchange         | -0.29                    | -0.34       |
| Transpiration reduction at 2.64 kPa           | Whole plant transpiration | -0.29                    | 0.00        |
| Breakpoint in transpiration rate              | Leaf gas exchange         | 0.25                     | -0.04       |
| Slope after breakpoint in transpiration rate  | Whole plant transpiration | 0.24                     | 0.19        |
| Limitation of A at 2.09 kPa                   | Leaf gas exchange         | -0.22                    | 0.22        |
| Slope after breakpoint in transpiration rate  | Leaf gas exchange         | 0.20                     | 0.28        |
| Slope before breakpoint in transpiration rate | Leaf gas exchange         | 0.16                     | -0.39       |
| Breakpoint in transpiration rate              | Whole plant transpiration | 0.14                     | 0.05        |
| Limitation of A at 1.50 kPa                   | Leaf gas exchange         | 0.13                     | -0.03       |
| Slope before breakpoint in transpiration rate | Whole plant transpiration | 0.09                     | -0.49       |
| Stomatal reduction                            | Leaf gas exchange         | 0.04                     | -0.41       |

<sup>1</sup>Variables measured by leaf gas exchange and at whole-plant transpiration were included. <sup>2</sup>Data were ordered following the absolute value of the first principal component loadings.

## 15 Figure legends

**Fig. 1:** Quantification of the transpiration reduction ( $\phi_E$ ) according to Franks et al. (1999) and Ryan et al. (2016). A linear regression was fitted through the transpiration rate at the first two air-to-leaf vapour pressure deficit ( $VPD_{leaf}$ ) levels. This linear regression was extrapolated (dashed line) to estimate the transpiration rate ( $E_{pred}$ ) at  $VPD_{leaf}$  of 2.69, 3.28 and 3.87 kPa.  $E_{pred}$  was then compared to the measured transpiration rate ( $E_{meas}$ ) to calculate  $\phi_E$  (Eq. 1).

**Fig. 2:** Three genotype groups (I, II, III) were defined by k-means clustering based on the stomatal reduction, transpiration reduction and photosynthetic limitation under increasing VPD (see variables in Table 2). Both variables measured by leaf gas exchange and at whole-plant transpiration were included. Lines and regions represent the three genotype groups from k-means clustering plotted along the first two principal components (Table 2). The first principal component was mainly determined by the limitation of photosynthetic rate at high VPDs and the transpiration reduction at leaf and whole-plant level. Important variables in the second principal component were the slope before the breakpoint in transpiration rate with increasing VPD and the stomatal reduction.

**Fig. 3:** Gas exchange response to step-increases in leaf-to-air vapour pressure deficit ( $VPD_{leaf}$ ) for 9 wild banana genotypes. Steady-state response of (A) stomatal conductance ( $g_s$ ), (B) transpiration rate ( $E_{rate}$ ), (C) photosynthetic rate ( $A$ ) and (D) intrinsic water use efficiency ( $iWUE$ ) to increasing  $VPD_{leaf}$ . Data represent mean $\pm$ se values after 60 min at a specific  $VPD_{leaf}$  level ( $n=3-7$ ). Significance is shown in Supplemental Table S1.

**Fig. 4:** Transpiration rate response of 9 wild banana genotypes to step-increases in leaf-to-air vapour pressure deficit ( $VPD_{leaf}$ ). A significant breakpoint in transpiration rate was identified for all genotypes (P-value Davies Test < 0.05). Solid grey lines represent slopes of the modelled segmented response. Grey point and dashed grey line represent the breakpoint in transpiration rate and the  $VPD_{leaf}$  of the breakpoint. Data represent mean $\pm$ se values after 60 min at a specific  $VPD_{leaf}$  level ( $n=3-7$ ).

**Fig. 5:** Slopes and breakpoints of the segmented transpiration rate response to step-increases in leaf-to-air vapour pressure deficit ( $VPD_{leaf}$ ). (A) Relation between the breakpoint in transpiration rate and the slope before the breakpoint. (B) Relation between the breakpoint in transpiration rate and the slope after the breakpoint. Three groups (I, II, III) were defined by k-means clustering and are represented by black lines connecting the included genotypes. All segmented responses were significant ( $P < 0.05$ ). Data represent the optimal estimated value $\pm$ se. ( $n=3-7$ ).

**Fig. 6:** Transpiration reduction ( $\phi_E$ ) and limitation of photosynthetic rate ( $A$ ) with increasing leaf-to-air vapour pressure deficit ( $VPD_{leaf}$ ). (A)  $\phi_E$  in response to increasing  $VPD_{leaf}$ .  $\phi_E$  was determined as shown in Eq. 1. (B) Limitation of  $A$  in response to increasing  $VPD_{leaf}$ . The limitation of  $A$  was determined as shown in Eq. 2. Data represent mean $\pm$ se. ( $n=3-7$ ). Significance is shown in Supplemental Tables S2 and S3.

**Fig. 7:** Stomatal reduction ( $\phi_{stom}$ ) in relation to the maximum observed stomatal conductance ( $max\ g_s$ ). The  $\phi_{stom}$  and  $max\ g_s$  were significantly correlated ( $R^2 = 0.88$ ,  $P < 0.001$ ). Data represent mean $\pm$ se ( $n=3-7$ ). Significance is shown in Supplemental Table S4.

**Fig. 8:** Whole-plant transpiration rate ( $E_{rate}$ ) response to step-increases in air vapour pressure deficit (VPD) for 9 wild banana genotypes. Note that VPD values slightly differed between genotypes

depending on the maximal drying capacity of the growth chamber. Data represent mean±se values after 60 min at a specific VPD level (n=4-8). Significance is shown in Supplemental Table S5.

**Fig. 9:** Whole-plant transpiration rate ( $E_{rate}$ ) response of 9 wild banana genotypes to step-increases in air vapour pressure deficit (VPD). A significant breakpoint in transpiration rate was identified for all genotypes (P-value Davies Test < 0.05). Solid grey lines represent slopes of the modelled segmented response. Grey point and dashed grey line represent the breakpoint in transpiration rate and the VPD of the breakpoint. Data represent mean±se (n=4-8).

**Fig. 10:** Slopes and breakpoints of the segmented whole-plant transpiration rate ( $E_{rate}$ ) response to step-increases in air vapour pressure deficit (VPD). (A) Relation between the breakpoint in whole-plant transpiration rate and the slope before the breakpoint. (B) Relation between the breakpoint in whole-plant transpiration rate and the slope after the breakpoint. Three groups (I, II, III) were defined by k-means clustering and are represented by black lines connecting the included genotypes. All segmented responses were significant (P < 0.05). Data represent the optimal estimated value± se (n = 4-8).

**Fig. 11:** Transpiration reduction measured at whole-plant level ( $\phi_{E, whole-plant}$ ) at VPD 2.64 kPa in relation to the transpiration reduction measured at leaf level ( $\phi_{E, leaf level}$ ) at VPD<sub>leaf</sub> 2.69 kPa. The  $\phi_E$  at leaf and whole-plant level were significantly correlated ( $R^2 = 0.52$ , P < 0.05). Data represent mean±se (n=4-8). Significant differences between genotypes or groups are indicated in Supplemental Tables S2 and S6.

## **Diverse responses among wild banana species to vapour pressure deficit, a solution for drought tolerance breeding?**

**Running title:** Physiological diversity in response to VPD

**David Eyland<sup>1\*</sup>, Clara Gambart<sup>1\*</sup>, Rony Swennen<sup>1,2</sup>, Sebastien Carpentier<sup>1,3#</sup>**

<sup>1</sup>Laboratory of Tropical Crop Improvement, Division of Crop Biotechnics, KU Leuven, Heverlee, Belgium

<sup>2</sup>International Institute of Tropical Agriculture, Banana Breeding, Kampala, Uganda

<sup>3</sup>Bioversity International, Banana Genetic Resources, Leuven, Belgium

\* first co-authorship

# **corresponding author**

Sebastien Carpentier  
s.carpentier@cgiar.org

## **Figures**



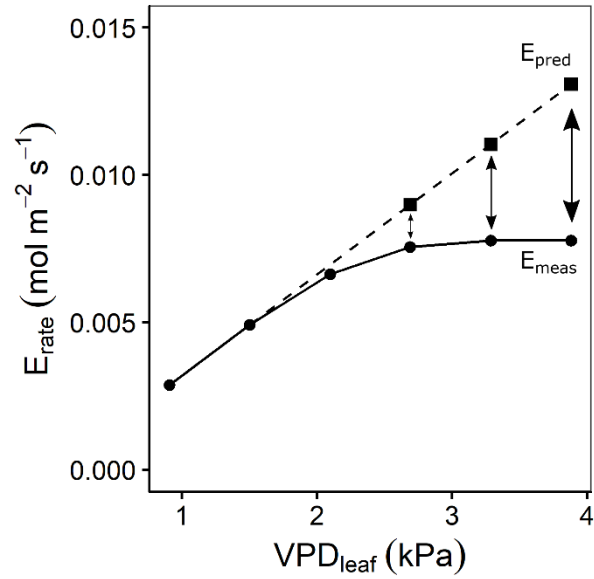

**Fig. 1:** Quantification of the transpiration reduction ( $\phi_E$ ) according to Franks et al. (1999) and Ryan et al. (2016). A linear regression was fitted through the transpiration rate at the first two air-to-leaf vapour pressure deficit ( $VPD_{leaf}$ ) levels. This linear regression was extrapolated (dashed line) to estimate the transpiration rate ( $E_{pred}$ ) at  $VPD_{leaf}$  of 2.69, 3.28 and 3.87 kPa.  $E_{pred}$  was then compared to the measured transpiration rate ( $E_{meas}$ ) to calculate  $\phi_E$  (Eq. 1).

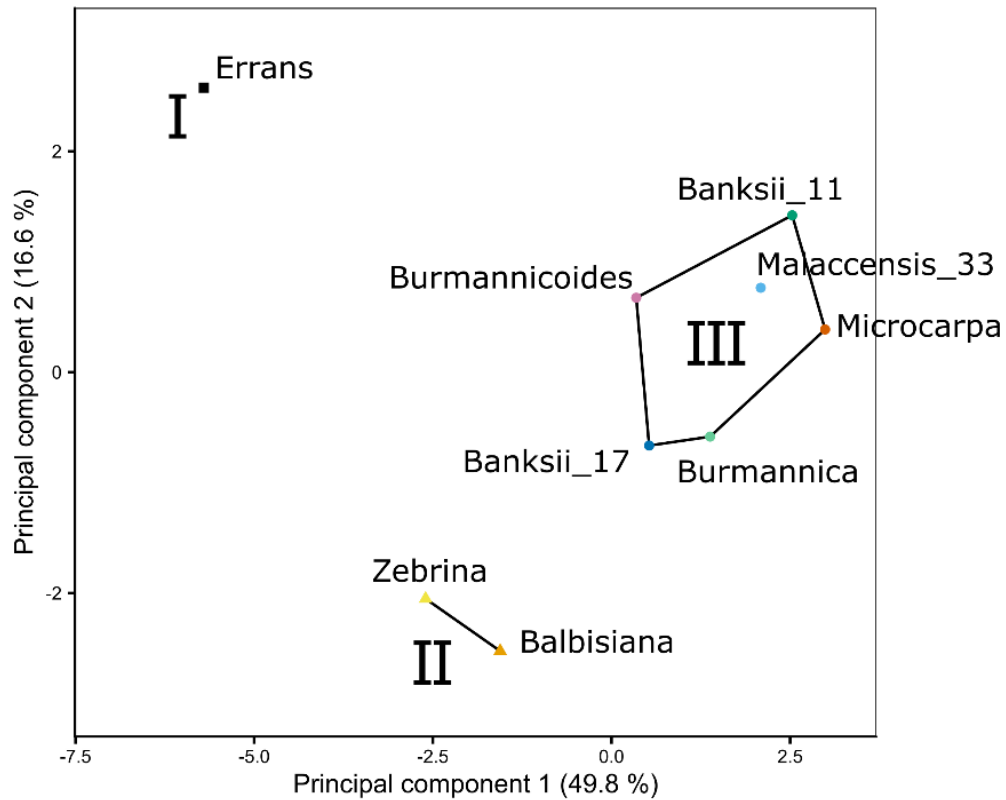

**Fig. 2:** Three genotype groups (I, II, III) were defined by k-means clustering based on the stomatal reduction, transpiration reduction and photosynthetic limitation under increasing VPD (see variables in Table 2). Both variables measured by leaf gas exchange and at whole-plant transpiration were included. Lines and regions represent the three genotype groups from k-means clustering plotted along the first two principal components (Table 2). The first principal component was mainly determined by the limitation of photosynthetic rate at high VPDs and the transpiration reduction at leaf and whole-plant level. Important variables in the second principal component were the slope before the breakpoint in transpiration rate with increasing VPD and the stomatal reduction.

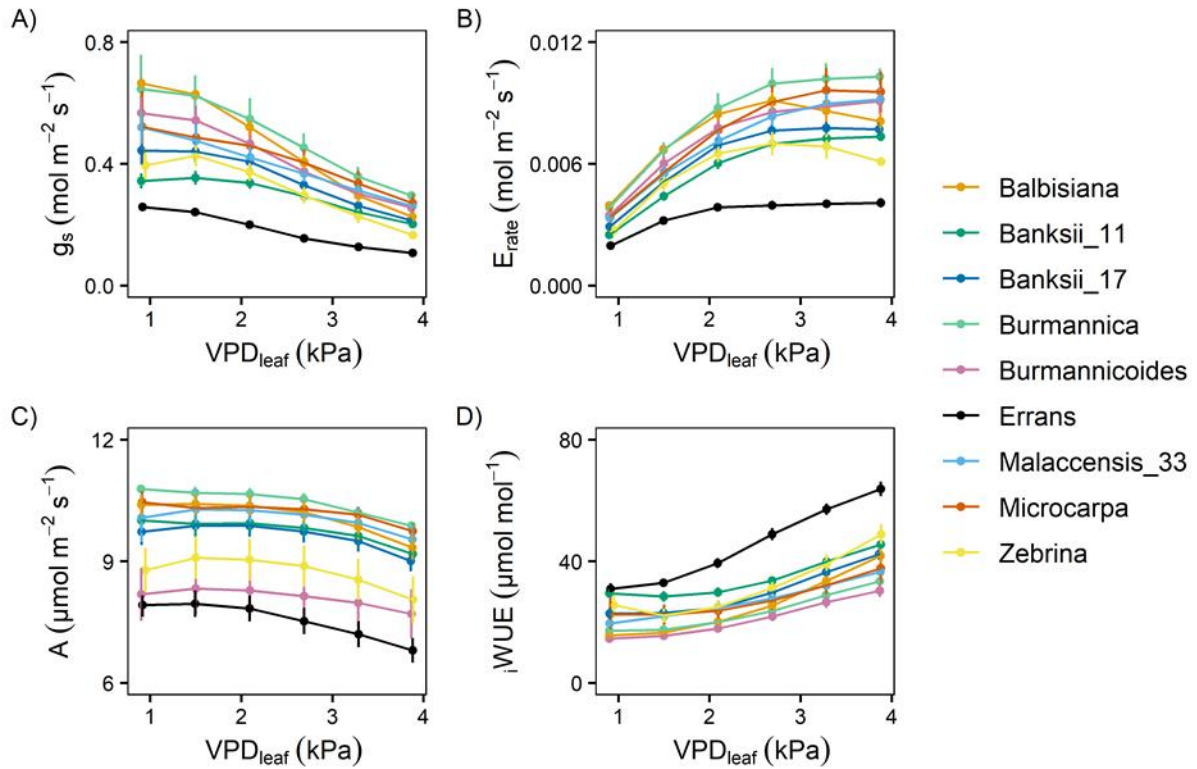

**Fig. 3:** Gas exchange response to step-increases in leaf-to-air vapour pressure deficit (VPD<sub>leaf</sub>) for 9 wild banana genotypes. Steady-state response of (A) stomatal conductance ( $g_s$ ), (B) transpiration rate ( $E_{\text{rate}}$ ), (C) photosynthetic rate ( $A$ ) and (D) intrinsic water use efficiency ( $i\text{WUE}$ ) to increasing VPD<sub>leaf</sub>. Data represent mean $\pm$ se values after 60 min at a specific VPD<sub>leaf</sub> level ( $n=3-7$ ). Significance is shown in Supplemental Table S1.

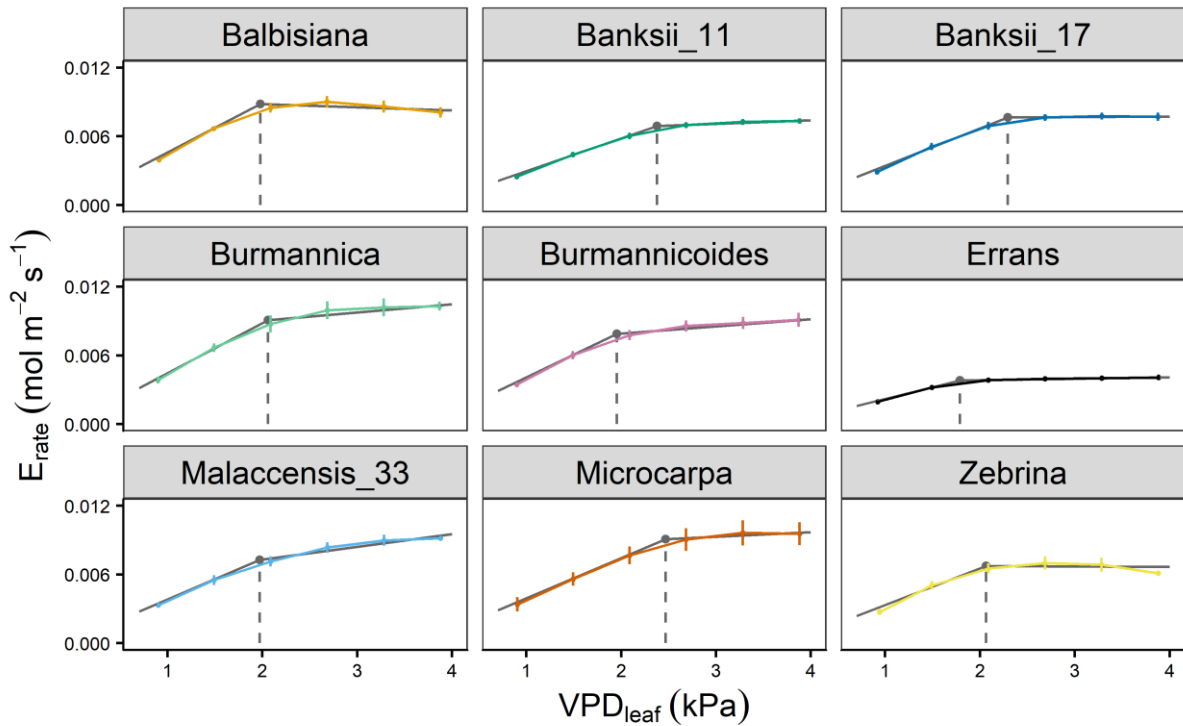

**Fig. 4:** Transpiration rate response of 9 wild banana genotypes to step-increases in leaf-to-air vapour pressure deficit ( $VPD_{leaf}$ ). A significant breakpoint in transpiration rate was identified for all genotypes ( $P$ -value Davies Test  $< 0.05$ ). Solid grey lines represent slopes of the modelled segmented response. Grey point and dashed grey line represent the breakpoint in transpiration rate and the  $VPD_{leaf}$  of the breakpoint. Data represent mean $\pm$ se values after 60 min at a specific  $VPD_{leaf}$  level ( $n=3-7$ ).

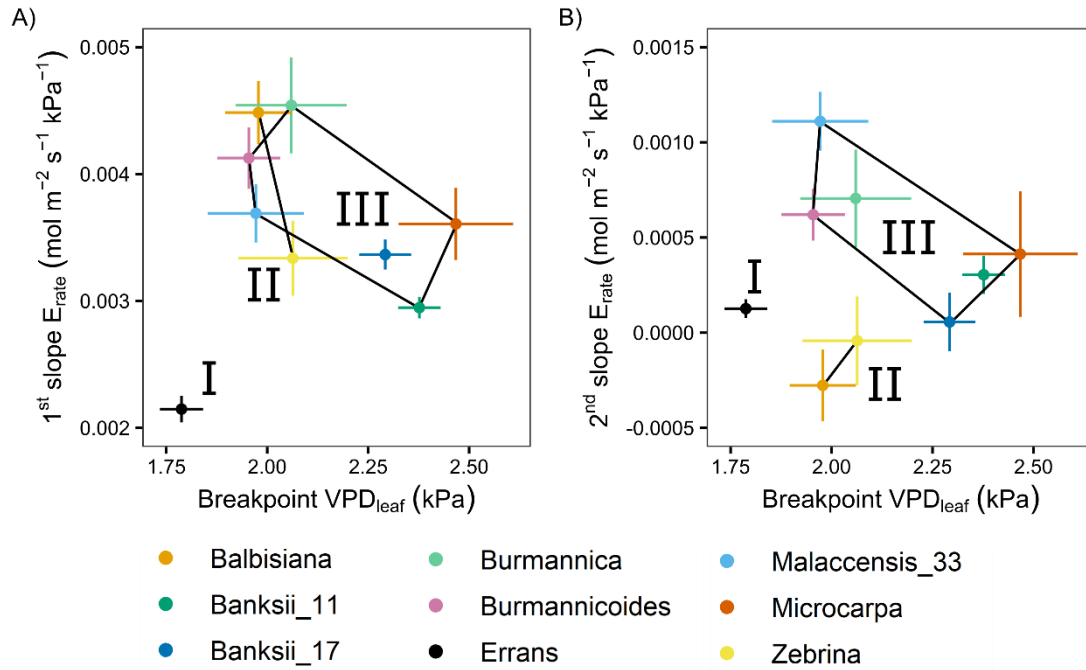

**Fig. 5:** Slopes and breakpoints of the segmented transpiration rate response to step-increases in leaf-to-air vapour pressure deficit (VPD<sub>leaf</sub>). (A) Relation between the breakpoint in transpiration rate and the slope before the breakpoint. (B) Relation between the breakpoint in transpiration rate and the slope after the breakpoint. Three groups (I, II, III) were defined by k-means clustering and are represented by black lines connecting the included genotypes. All segmented responses were significant ( $P < 0.05$ ). Data represent the optimal estimated value  $\pm$  se. ( $n=3-7$ ).

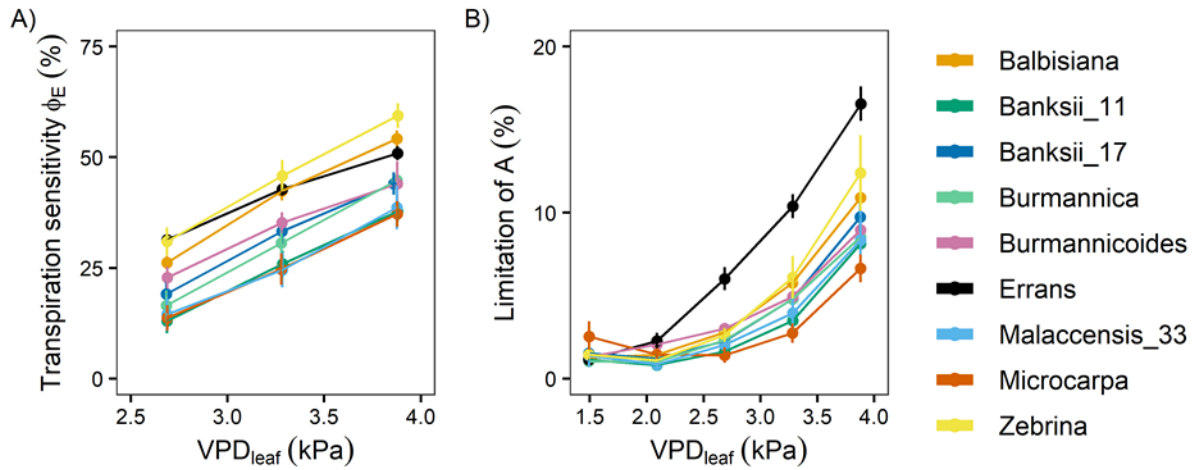

**Fig. 6:** Transpiration reduction ( $\phi_E$ ) and limitation of photosynthetic rate (A) with increasing leaf-to-air vapour pressure deficit ( $VPD_{leaf}$ ). (A)  $\phi_E$  in response to increasing  $VPD_{leaf}$ .  $\phi_E$  was determined as shown in Eq. 1. (B) Limitation of A in response to increasing  $VPD_{leaf}$ . The limitation of A was determined as shown in Eq. 2. Data represent mean  $\pm$  se. (n=3-7). Significance is shown in Supplemental Tables S2 and S3.

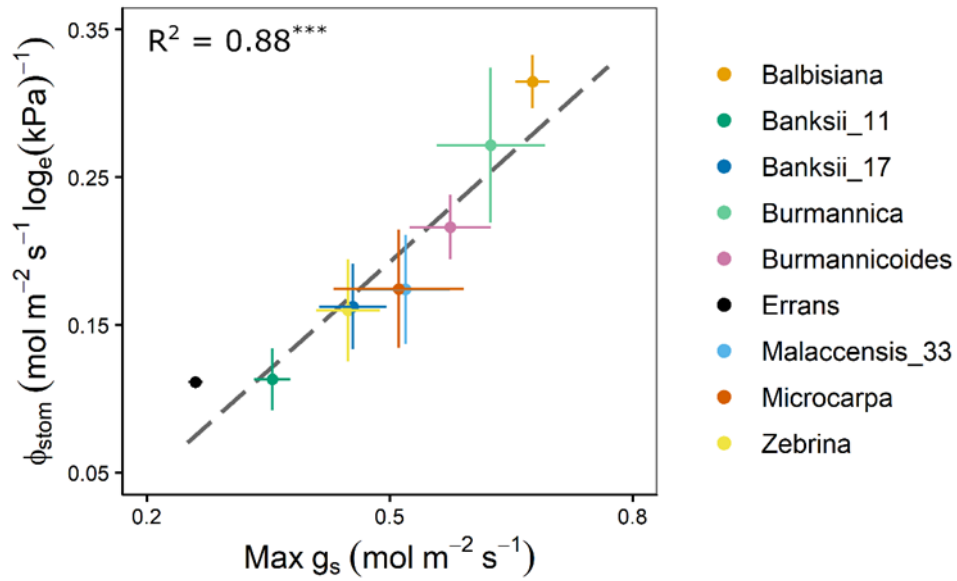

**Fig. 7:** Stomatal reduction ( $\phi_{\text{stom}}$ ) in relation to the maximum observed stomatal conductance (max  $g_s$ ). The  $\phi_{\text{stom}}$  and max  $g_s$  were significantly correlated ( $R^2 = 0.88$ ,  $P < 0.001$ ). Data represent mean $\pm$ se ( $n=3-7$ ). Significance is shown in Supplemental Table S4.

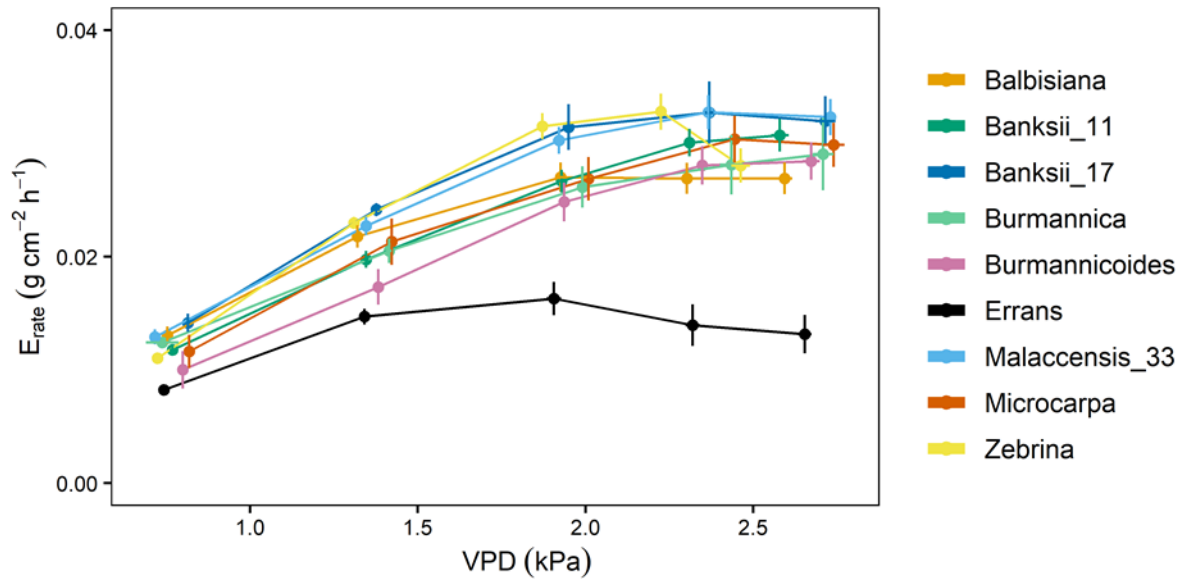

**Fig. 8:** Whole-plant transpiration rate ( $E_{rate}$ ) response to step-increases in air vapour pressure deficit (VPD) for 9 wild banana genotypes. Note that VPD values slightly differed between genotypes depending on the maximal drying capacity of the growth chamber. Data represent mean $\pm$ se values after 60 min at a specific VPD level (n=4-8). Significance is shown in Supplemental Table S5.



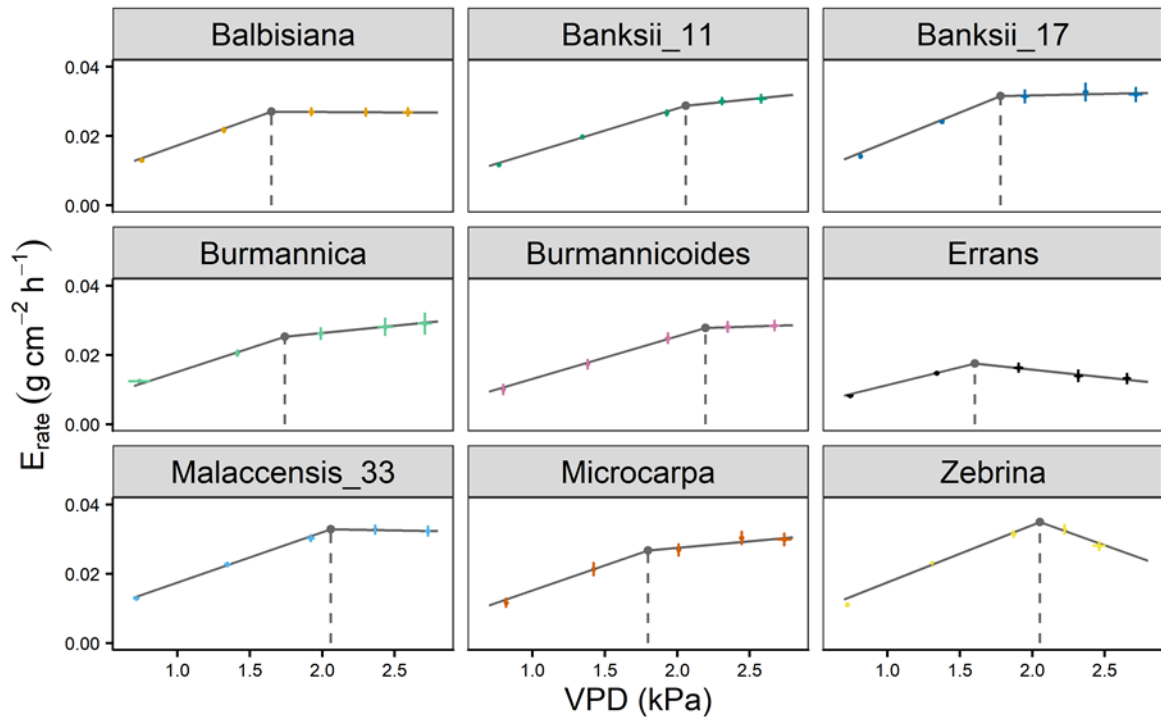

**Fig. 9:** Whole-plant transpiration rate ( $E_{rate}$ ) response of 9 wild banana genotypes to step-increases in air vapour pressure deficit (VPD). A significant breakpoint in transpiration rate was identified for all genotypes ( $P$ -value Davies Test  $< 0.05$ ). Solid grey lines represent slopes of the modelled segmented response. Grey point and dashed grey line represent the breakpoint in transpiration rate and the VPD of the breakpoint. Data represent mean $\pm$ se ( $n=4-8$ ).

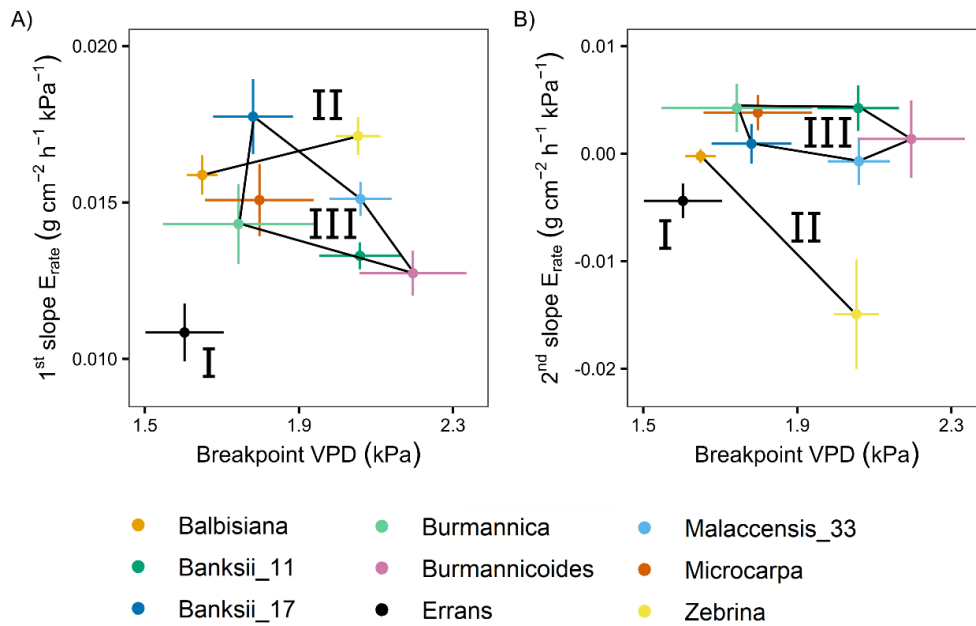

**Fig. 10:** Slopes and breakpoints of the segmented whole-plant transpiration rate ( $E_{rate}$ ) response to step-increases in air vapour pressure deficit (VPD). (A) Relation between the breakpoint in whole-plant transpiration rate and the slope before the breakpoint. (B) Relation between the breakpoint in whole-plant transpiration rate and the slope after the breakpoint. Three groups (I, II, III) were defined by k-means clustering and are represented by black lines connecting the included genotypes. All segmented responses were significant ( $P < 0.05$ ). Data represent the optimal estimated value  $\pm$  se ( $n = 4-8$ ).

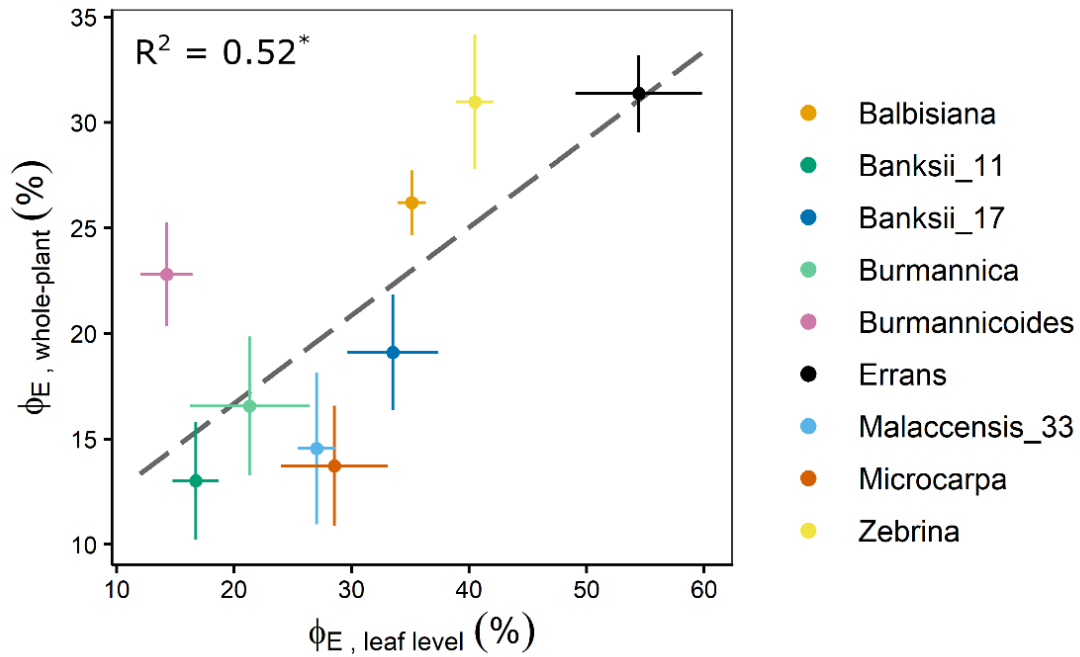

**Fig. 11:** Transpiration reduction measured at whole-plant level ( $\phi_{E, \text{whole-plant}}$ ) at VPD 2.64 kPa in relation to the transpiration reduction measured at leaf level ( $\phi_{E, \text{leaf level}}$ ) at VPD<sub>leaf</sub> 2.69 kPa. The  $\phi_E$  at leaf and whole-plant level were significantly correlated ( $R^2 = 0.52$ ,  $P < 0.05$ ). Data represent mean $\pm$ se (n=4-8). Significant differences between genotypes or groups are indicated in Supplemental Tables S2 and S6.
